# Supplementary material for: Real-world emission characteristics of VOCs from typical cargo ships and their potential contributions to SOA and O 3 under low-sulfur fuel policies
Source: Copernicus journal article supplement (doi:10.5194/egusphere-2024-652), 2024-03-07
Supplement: Supplementary file 2 [file egusphere-2024-652-supplement.pdf]

---

**Real-world emission characteristics of VOCs from typical cargo ships and their potential contributions to SOA and O<sub>3</sub> under low-sulfur fuel policies**

Fan Zhang, Binyu Xiao, Zeyu Liu, Yan Zhang\*, Chongguo Tian, Rui Li, Can Wu, Yali Lei, Si Zhang, Xinyi Wan, Yubao Chen, Yong Han, Min Cui, Cheng Huang, Hongli Wang, Yingjun Chen, Gehui Wang\*

Table S1 Characteristics of the fuels used in the test ships

|                                                | Unit                | Detection limit | CCS1 /HFO | CCS1 /diesel | CCS2 /diesel | OGV1 /HFO | OGV1 /diesel | OGV2 /HFO | OGV2 /diesel | OGV3 /HFO | OGV3 /diesel | ICS /diesel |
|------------------------------------------------|---------------------|-----------------|-----------|--------------|--------------|-----------|--------------|-----------|--------------|-----------|--------------|-------------|
| Gross calorific value                          | MJ kg <sup>-1</sup> |                 |           |              |              | 44.21     | 45.76        | 42.62     | 45.72        | 43.08     | 45.64        |             |
| Net calorific value                            | MJ kg <sup>-1</sup> |                 |           |              |              | 41.45     | 42.75        | 40.28     | 42.71        | 40.61     | 42.66        |             |
| Kinematic viscosity (50°C), mm <sup>2</sup> /s |                     |                 |           |              |              | 44.04     |              |           |              |           |              |             |
| Kinematic viscosity (40°C), mm <sup>2</sup> /s |                     |                 |           |              |              |           |              |           |              |           |              |             |
| Kinematic viscosity (20°C), mm <sup>2</sup> /s |                     |                 | 6.3       | 105          |              |           | 5.216        | 152.3     | 4.724        | 161.1     | 5.363        |             |
| Moisture                                       | %m                  |                 | N.D.      | 0.35         |              | 0.03      | N.D.         | 0.09      | N.D.         | 0.12      | N.D.         |             |
| Ash                                            | %m                  |                 | 0.008     | 0.035        |              |           |              |           |              |           |              |             |
| Sulfur (S)                                     | %m                  | 0.01            | 0.39      | N.D.         | N.D.         | 0.50      | 0.03         | 0.43      | 0.02         | 0.43      | 0.05         | N.D.        |
| Carbon (C)                                     | %m                  | 0.30            | 86.95     | 85.5         | 85.82        | 86.62     | 80.80        | 82.4      | 79.6         | 69.9      | 66.5         | 85.5        |
| Hydrogen (H)                                   | %m                  | 0.30            | 10.58     | 12.83        | 13.2         | 11.33     | 8.15         | 9.68      | 12.3         | 11.3      | 10.61        |             |
| Nitrogen (N)                                   | %m                  | 0.30            | 0.59      | N.D.         | N.D.         | N.D.      | N.D.         | 0.39      | N.D.         | 2.36      | N.D.         |             |
| Oxygen (O)                                     | %m                  | 0.30            | N.D.      | N.D.         | 2.26         | 0.36      | N.D.         | 1.53      | 0.59         | 1.34      | 0.73         |             |
| Vanadium (V)                                   | mg kg <sup>-1</sup> | 0.05            | 5.41      | N.D.         | N.D.         |           |              | N.D.      | 0.20         | 4.00      | N.D.         |             |
| Nickel (Ni)                                    | mg kg <sup>-1</sup> | 0.01            | 18.91     | N.D.         | N.D.         |           |              | 16.0      | 0.10         | 15.0      | N.D.         |             |
| Sodium (Na)                                    | mg kg <sup>-1</sup> | 0.10            | 3.08      | 0.339        | 0.467        |           |              | 6.00      | 0.10         | 8.00      | 0.10         |             |
| Lead (Pb)                                      | mg kg <sup>-1</sup> | 0.10            | 3.39      | 2.746        | 3.831        |           |              | N.D.      | 0.30         | N.D.      | N.D.         |             |
| Zinc (Zn)                                      | mg kg <sup>-1</sup> | 0.01            | 30.43     | 0.168        | 0.168        |           |              | 2.00      | 0.40         | 8.00      | 0.20         |             |
| Aluminum + Silicon (Al + Si)                   | mg kg <sup>-1</sup> | 0.10            | 10.31     | 1.09         | 0.956        |           |              | 8.00      | 0.80         | 12.0      | 0.90         |             |

N.D., not detected.

Table S2 Engine type, operating mode, and fuel type of each ship for each measurement

| Ship ID | Engine type      | Operating mode          | Ship ID | Engine type | Operating mode   |                    |                    |
|---------|------------------|-------------------------|---------|-------------|------------------|--------------------|--------------------|
| CCS1    | Main engine      | Maneuvering_diesel      | OGV3    | Main engine | 75%_diesel       |                    |                    |
|         |                  | Cruise_HFO              |         |             | 25%_HFO          |                    |                    |
|         | Auxiliary engine | Diesel                  |         |             | 50%_HFO          |                    |                    |
| CCS2    | Main engine      | Idling_diesel           |         |             | 75%_HFO          |                    |                    |
|         |                  | Maneuvering_diesel      |         |             | 95%_HFO          |                    |                    |
|         |                  | Cruise_diesel           |         |             | Auxiliary engine | 50%_diesel         |                    |
| OGV1    | Main engine      | 20%_diesel <sup>a</sup> |         |             | 50%_HFO          |                    |                    |
|         |                  | 75%_diesel              |         |             | 75%_HFO          |                    |                    |
|         |                  | 75%_diesel (NCR)        |         |             | ICS1             | Main engine        | Maneuvering_diesel |
|         |                  | 25%_HFO                 |         |             |                  | Cruise_diesel      |                    |
|         |                  | 50%_HFO                 |         |             | ICS2             | Main engine        | Idling_diesel      |
|         |                  | 75%_HFO                 |         |             |                  | Maneuvering_diesel |                    |
|         |                  | 85%_HFO                 |         |             |                  | Cruise_diesel      |                    |
|         | 100%_HFO         | ICS3                    |         |             | Main engine      | Maneuvering_diesel |                    |
|         | Auxiliary engine |                         |         |             | Cruise_diesel    |                    |                    |
|         |                  | ICS4                    |         |             | Main engine      | Maneuvering_diesel |                    |
|         |                  | Cruise_diesel           |         |             |                  |                    |                    |
| OGV2    | Main engine      | 50%_HFO                 |         |             |                  |                    |                    |
|         |                  | 70%_HFO                 |         |             |                  |                    |                    |
|         |                  | 90%_HFO                 |         |             |                  |                    |                    |
|         | Auxiliary engine | 60%_diesel              |         |             |                  |                    |                    |
|         |                  | 75%_diesel              |         |             |                  |                    |                    |
|         |                  | 50%_HFO                 |         |             |                  |                    |                    |
|         |                  |                         |         |             | 75%_HFO          |                    |                    |
|         | Boiler           |                         |         |             | 75%_HFO          |                    |                    |

<sup>a</sup>, means percentage of engine load under what type of fuel

Table S3 The detected VOC species, detection limits and MIR used in this study

| No. | Description                 | Detection limit (mg/m <sup>3</sup> ) | MIR   | No. | Description             | Detection limit (mg/m <sup>3</sup> ) | MIR   | No. | Description                          | Detection limit (mg/m <sup>3</sup> ) | MIR    |
|-----|-----------------------------|--------------------------------------|-------|-----|-------------------------|--------------------------------------|-------|-----|--------------------------------------|--------------------------------------|--------|
| 1   | ethanol                     | 0.0004                               | 1.53  | 37  | 2,3-dimethyl butane     | 0.0008                               | 0.97  | 73  | ethyl chloride                       | 0.0006                               | 0.29   |
| 2   | acrolein                    | 0.0005                               | 7.45  | 38  | 2-methyl pentane        | 0.0008                               | 1.50  | 74  | trichlorofluoromethane               | 0.0012                               | -      |
| 3   | acetone                     | 0.0005                               | 0.36  | 39  | 3-methyl pentane        | 0.0008                               | 1.80  | 75  | 1,1-dichloroethene                   | 0.0009                               | 1.79   |
| 4   | isopropyl alcohol           | 0.0005                               | 0.61  | 40  | n-hexane                | 0.0008                               | 1.24  | 76  | dichloromethane                      | 0.0008                               | 0.041  |
| 5   | methyl tertiary butyl ether | 0.0008                               | 0.73  | 41  | methyl cyclopentane     | 0.0008                               | 2.19  | 77  | chloroform                           | 0.0011                               | 0.022  |
| 6   | vinyl acetate               | 0.0008                               | 3.20  | 42  | 2,4-dimethyl pentane    | 0.0009                               | 1.55  | 78  | bromoform                            | 0.0022                               | 0.022  |
| 7   | methyl ethyl ketone         | 0.0007                               | 1.48  | 43  | cyclohexane             | 0.0008                               | 1.25  | 79  | dichlorotetrafluoroethane            | 0.0015                               | -      |
| 8   | ethyl acetate               | 0.0008                               | 0.63  | 44  | 2-methyl hexane         | 0.0009                               | 1.19  | 80  | 1,1,2-trichloro1,2,2 trifluoroethane | 0.0017                               |        |
| 9   | methyl methacrylate         | 0.0009                               | 15.61 | 45  | 2,3-dimethyl pentane    | 0.0009                               | 1.34  | 81  | trans-1,2-dichloroethene             | 0.0009                               | 1.70   |
| 10  | methyl isobutyl ketone      | 0.0009                               | 3.14  | 46  | 3-methyl hexane         | 0.0009                               | 1.61  | 82  | 1,1-dichloroethane                   | 0.0009                               | 0.069  |
| 11  | methyl n-butyl ketone       | 0.0009                               | 3.14  | 47  | 2,2,4-trimethyl pentane | 0.0010                               | 1.26  | 83  | cis-1,2-dichloroethene               | 0.0009                               | 1.70   |
| 12  | benzene                     | 0.0007                               | 0.72  | 48  | n-heptane               | 0.0009                               | 1.07  | 84  | 1,2-dichloroethane                   | 0.0009                               | 0.21   |
| 13  | toluene                     | 0.0008                               | 4.00  | 49  | methyl cyclohexane      | 0.0009                               | 1.70  | 85  | 1,1,1-trichloroethane                | 0.0012                               | 0.0049 |
| 14  | ethyl benzene               | 0.0009                               | 3.04  | 50  | 2,3,4-trimethyl pentane | 0.0010                               | 1.03  | 86  | carbon tetrachloride                 | 0.0014                               | -      |
| 15  | m/p-xylene                  | 0.0009                               | 7.795 | 51  | 2-methyl heptane        | 0.0010                               | 1.07  | 87  | 1,2-dichloropropane                  | 0.0010                               | 0.29   |
| 16  | styrene                     | 0.0009                               | 1.73  | 52  | 3-methyl heptane        | 0.0010                               | 1.24  | 88  | monobromodichloromethane             | 0.0014                               | 0.022  |
| 17  | o-xylene                    | 0.0009                               | 7.64  | 53  | n-octane                | 0.0010                               | 0.90  | 89  | trichloroethylene                    | 0.0012                               | 0.64   |
| 18  | isopropyl benzene           | 0.0011                               | 2.52  | 54  | n-nonane                | 0.0011                               | 0.78  | 90  | cis-1,3-dichloropropene              | 0.0010                               | 3.70   |
| 19  | n-propyl benzene            | 0.0011                               | 2.03  | 55  | n-Decane                | 0.0013                               | 0.68  | 91  | trans-1,3-dichloropropene            | 0.0010                               | 5.03   |
| 20  | m-ethyl toluene             | 0.0011                               | 7.39  | 56  | n-undecane              | 0.0014                               | 0.61  | 92  | 1,1,2-trichloroethane                | 0.0012                               | 0.086  |
| 21  | p-ethyl toluene             | 0.0011                               | 4.44  | 57  | n-dodecane              | 0.0015                               | 0.55  | 93  | 1,2-dibromoethane                    | 0.0017                               | 0.102  |
| 22  | 1,2,3-trimethyl benzene     | 0.0011                               | 11.97 | 58  | ethylene                | 0.0003                               | 9.00  | 94  | perchloroethylene                    | 0.0015                               | 0.031  |
| 23  | 1,3,5-trimethyl benzene     | 0.0011                               | 11.76 | 59  | propene                 | 0.0004                               | 11.66 | 95  | 1,1,2,2-tetrachloroethane            | 0.0015                               | 0.086  |
| 24  | o-ethyl toluene             | 0.0011                               | 5.59  | 60  | butene                  | 0.0005                               | 9.73  | 96  | hexachlorobutadiene                  | 0.0023                               | -      |
| 25  | 1,2,4-trimethyl benzene     | 0.0011                               | 8.87  | 61  | pentene                 | 0.0006                               | 7.21  | 97  | monochlorobenzene                    | 0.0010                               | 0.32   |
| 26  | m-diethyl benzene           | 0.0012                               | 7.10  | 62  | 1,3-butadiene           | 0.0005                               | 12.61 | 98  | benzyl chloride                      | 0.0011                               | 4.00   |
| 27  | p-diethyl benzene           | 0.0012                               | 4.43  | 63  | trans-2-butene          | 0.0005                               | 15.16 | 99  | 1,3-dichlorobenzene                  | 0.0013                               | 0.18   |
| 28  | naphthalene                 | 0.0011                               | 3.34  | 64  | cis-2-butene            | 0.0005                               | 14.24 | 100 | p-dichlorobenzene                    | 0.0013                               | 0.178  |
| 29  | ethane                      | 0.0003                               | 0.28  | 65  | isoprene                | 0.0006                               | 10.61 | 101 | o-dichlorobenzene                    | 0.0013                               | 0.178  |
| 30  | propane                     | 0.0004                               | 0.49  | 66  | trans-2-pentene         | 0.0006                               | 10.56 | 102 | 1,2,4-trichlorobenzene               | 0.0016                               | 0.178  |
| 31  | isobutane                   | 0.0005                               | 1.23  | 67  | cis-2-pentene           | 0.0006                               | 10.38 | 103 | dibromochloromethane                 | 0.0018                               | 0.022  |
| 32  | n-butane                    | 0.0005                               | 1.15  | 68  | hexene                  | 0.0008                               | 5.49  | 104 | tetrahydrofuran                      | 0.0006                               | 4.31   |
| 33  | isopentane                  | 0.0006                               | 1.23  | 69  | dichlorodifluoromethane | 0.0011                               | -     | 105 | carbon disulfide                     | 0.0007                               | 0.25   |

---

|    |                     |        |      |    |                 |        |        |     |             |        |      |
|----|---------------------|--------|------|----|-----------------|--------|--------|-----|-------------|--------|------|
| 34 | n-pentane           | 0.0006 | 1.31 | 70 | methyl chloride | 0.0004 | 0.04   | 106 | 1,4-dioxane | 0.0008 | 2.62 |
| 35 | 2,2-dimethyl butane | 0.0008 | 1.17 | 71 | vinyl chloride  | 0.0006 | 2.83   |     |             |        |      |
| 36 | cyclopentane        | 0.0006 | 2.39 | 72 | methyl bromide  | 0.0008 | 0.0187 |     |             |        |      |

---

Table S4 The SOA yields of VOC species used in this study

| No. | Description         | Yeild                |                     | Data sources            |
|-----|---------------------|----------------------|---------------------|-------------------------|
|     |                     | High-NO <sub>x</sub> | Low-NO <sub>x</sub> |                         |
| 1   | Benzene             | 0.281                | 0.369               | (Ng et al., 2007)       |
| 2   | Toluene             | 0.107                | 0.303               | (Ng et al., 2007)       |
| 3   | Ethyl Benzene       | 0.064                | 0.363               | (Ng et al., 2007)       |
| 4   | m/p-xylene          | 0.064                | 0.363               | (Ng et al., 2007)       |
| 5   | Styrene             | 0.064                | 0.363               | (Ng et al., 2007)       |
| 6   | o-Xylene            | 0.064                | 0.363               | (Ng et al., 2007)       |
| 7   | Isopropyl Benzene   | 0.064                | 0.363               | (Ng et al., 2007)       |
| 8   | n-Propyl Benzene    | 0.064                | 0.363               | (Ng et al., 2007)       |
| 9   | m-Ethyl Toluene     | 0.064                | 0.363               | (Ng et al., 2007)       |
| 10  | p-Ethyl Toluene     | 0.064                | 0.363               | (Ng et al., 2007)       |
| 11  | Naphthalene         | 0.064                | 0.363               | (Chan et al., 2009)     |
| 12  | Cyclopentane        | 0.04                 | 0.04                | (Lim and Ziemann, 2009) |
| 13  | Methyl Cyclopentane | 0.04                 | 0.04                | (Lim and Ziemann, 2009) |
| 14  | Cyclohexane         | 0.04                 | 0.04                | (Lim and Ziemann, 2009) |
| 15  | n-Heptane           | 0.009                | 0.009               | (Lim and Ziemann, 2009) |
| 16  | Methyl Cyclohexane  | 0.04                 | 0.04                | (Lim and Ziemann, 2009) |
| 17  | 2-Methyl Heptane    | 0.009                | 0.009               | (Lim and Ziemann, 2009) |
| 18  | 3-Methyl Heptane    | 0.009                | 0.009               | (Lim and Ziemann, 2009) |
| 19  | n-Octane            | 0.041                | 0.041               | (Lim and Ziemann, 2009) |
| 20  | n-Nonane            | 0.081                | 0.081               | (Lim and Ziemann, 2009) |
| 21  | n-Decane            | 0.146                | 0.146               | (Lim and Ziemann, 2009) |
| 22  | n-Undecane          | 0.27                 | 0.27                | (Lim and Ziemann, 2009) |
| 23  | n-Dodecane          | 0.348                | 0.348               | (Lim and Ziemann, 2009) |
| 24  | Ethylene            | 0.0169               | 0.0169              | (Derwent et al., 2010)  |
| 25  | Propene             | 0.0208               | 0.0208              | (Derwent et al., 2010)  |
| 26  | Butene              | 0.0156               | 0.0156              | (Derwent et al., 2010)  |
| 27  | 1,3-Butadiene       | 0.0234               | 0.0234              | (Derwent et al., 2010)  |
| 28  | Trans-2-Butene      | 0.052                | 0.052               | (Derwent et al., 2010)  |
| 29  | Cis-2-Butene        | 0.0468               | 0.0468              | (Derwent et al., 2010)  |
| 30  | Isoprene            | 0.02                 | 0.02                | (Grosjean, 1992)        |
| 31  | Trans-2-Pentene     | 0.0403               | 0.0403              | (Derwent et al., 2010)  |
| 32  | Cis-2-Pentene       | 0.0403               | 0.0403              | (Derwent et al., 2010)  |

Table S5 Emission factors of gaseous pollutants for the test ships

| Ship ID | Engine type      | Operating mode     | CO <sub>2</sub><br>(g kg <sup>-1</sup> fuel) | CO<br>(g kg <sup>-1</sup> fuel) | NO <sub>2</sub><br>(g kg <sup>-1</sup> fuel) | NO<br>(g kg <sup>-1</sup> fuel) | NO <sub>x</sub><br>(g kg <sup>-1</sup> fuel) | VOCs<br>(g kg <sup>-1</sup> fuel) |
|---------|------------------|--------------------|----------------------------------------------|---------------------------------|----------------------------------------------|---------------------------------|----------------------------------------------|-----------------------------------|
| CCS1    | Main engine      | Maneuvering_diesel | 3124                                         | 18.6                            | 2.46                                         | 32.8                            | 35.3                                         | 1.87                              |
|         |                  | Cruise_HFO         | 3145                                         | 5.49                            | 2.66                                         | 35                              | 37.6                                         | 2.22                              |
|         | Auxiliary engine | Diesel             | 3148                                         | 3.51                            | 1.89                                         | 27.9                            | 29.8                                         | 0.6                               |
| CCS2    | Main engine      | Idling_diesel      | 3129                                         | 15.7                            | 5.15                                         | 31.2                            | 36.4                                         | 3.01                              |
|         |                  | Maneuvering_diesel | 3077                                         | 48.8                            | 1.17                                         | 18                              | 19.1                                         | 1.00                              |
|         |                  | Cruise_diesel      | 3145                                         | 5.38                            | 1.18                                         | 19.7                            | 20.9                                         | 0.10                              |
| OGV1    | Main engine      | 20%_diesel         | 3128                                         | 2.49                            | 22.9                                         | 59.8                            | 82.7                                         | 2.10                              |
|         |                  | 75%_diesel         | 3132                                         | 1.49                            | 9.57                                         | 64.1                            | 73.7                                         | 0.45                              |
|         |                  | 75%_diesel (NCR)   | 3129                                         | 2.44                            | 6.23                                         | 35.8                            | 42.1                                         | 0.46                              |
|         |                  | 25%_HFO            | 3173                                         | 2.59                            | 22.2                                         | 66.9                            | 89.1                                         | 0.75                              |
|         |                  | 50%_HFO            | 3178                                         | 2.44                            | 12.8                                         | 61                              | 73.8                                         | 0.81                              |
|         |                  | 75%_HFO            | 3170                                         | 2.46                            | 8.18                                         | 51.7                            | 59.9                                         | 0.59                              |
|         |                  | 85%_HFO            | 3173                                         | 2.46                            | 8.47                                         | 54                              | 62.4                                         | 1.65                              |
|         |                  | 100%_HFO           | 3173                                         | 3.8                             | 6.31                                         | 56.7                            | 63                                           | 0.95                              |
|         | Auxiliary engine | 50%_diesel         | 3108                                         | 13.8                            | 1.38                                         | 27.1                            | 28.4                                         | 0.94                              |
|         |                  | 50%_HFO            | 3174                                         | 3.33                            | 1.45                                         | 20.8                            | 22.3                                         | 0.31                              |
| OGV2    | Main engine      | 50%_HFO            | 3181                                         | 2.93                            | 18.58                                        | 74.23                           | 92.81                                        | 0.23                              |
|         |                  | 70%_HFO            | 3182                                         | 2.35                            | 12.2                                         | 64.7                            | 76.8                                         | 0.14                              |
|         |                  | 90%_HFO            | 3182                                         | 1.91                            | 12                                           | 62.2                            | 74.2                                         | 0.10                              |
|         | Auxiliary engine | 60%_diesel         | 3126                                         | 2.63                            | 1.89                                         | 31.16                           | 33.04                                        | 0.09                              |
|         |                  | 75%_diesel         | 3132                                         | 1.32                            | 1.98                                         | 25.82                           | 27.8                                         | 0.12                              |
|         |                  | 50%_HFO            | 3183                                         | 1.86                            | 3.62                                         | 29.79                           | 33.41                                        | 0.37                              |
|         |                  | 75%_HFO            | 3183                                         | 2                               | 3.28                                         | 33.83                           | 37.11                                        | 0.23                              |

|         |                  |                    |      |      |      |      |      |      |
|---------|------------------|--------------------|------|------|------|------|------|------|
|         | Boiler           | HFO                | 3186 | 0.62 | 0.15 | 6.11 | 6.26 | 0.17 |
| OGV3    | Main engine      | 75%_diesel         | 3131 | 1.64 | 7.47 | 49.8 | 57.3 | 0.22 |
|         |                  | 25%_HFO            | 3183 | 1.9  | 18.8 | 62.2 | 81   | 0.14 |
|         |                  | 50%_HFO            | 3182 | 2.49 | 8.09 | 60.2 | 68.3 | 0.46 |
|         |                  | 75%_HFO            | 3183 | 1.78 | 7.11 | 56.5 | 63.6 | 0.34 |
|         |                  | 95%_HFO            | 3181 | 2.7  | 2.37 | 40.5 | 42.9 | 0.37 |
|         | Auxiliary engine | 50%_diesel         | 3130 | 2.78 | 1.02 | 24.4 | 25.4 | 0.13 |
|         |                  | 50%_HFO            | 3184 | 2.51 | 0.57 | 25.8 | 26.3 | 0.23 |
| 75%_HFO |                  | 3185               | 1.91 | 0.4  | 26.6 | 27   | 0.15 |      |
| ICS1    | Main engine      | Maneuvering_diesel | 3108 | 16.9 | 8.36 | 55.9 | 64.2 | 0.49 |
|         |                  | Cruise_diesel      | 3068 | 42.5 | 7.64 | 46.2 | 53.8 | 0.43 |
| ICS2    | Main engine      | Idling_diesel      | 2622 | 327  | 15.8 | 36.1 | 51.9 | 1.08 |
|         |                  | Maneuvering_diesel | 3117 | 11.5 | 14.5 | 68.2 | 82.7 | 0.11 |
|         |                  | Cruise_diesel      | 3116 | 12.2 | 12.6 | 72.4 | 85   | 0.17 |
| ICS3    | Main engine      | Maneuvering_diesel | 2852 | 180  | 13.2 | 44.7 | 57.9 | 2.53 |
|         |                  | Cruise_diesel      | 2924 | 134  | 11.2 | 57.5 | 68.8 | 2.87 |
| ICS4    | Main engine      | Maneuvering_diesel | 2998 | 87.2 | -    | -    | -    | -    |
|         |                  | Cruise_diesel      | 3103 | 20.3 | 8.06 | 12.3 | 20.4 | 0.35 |



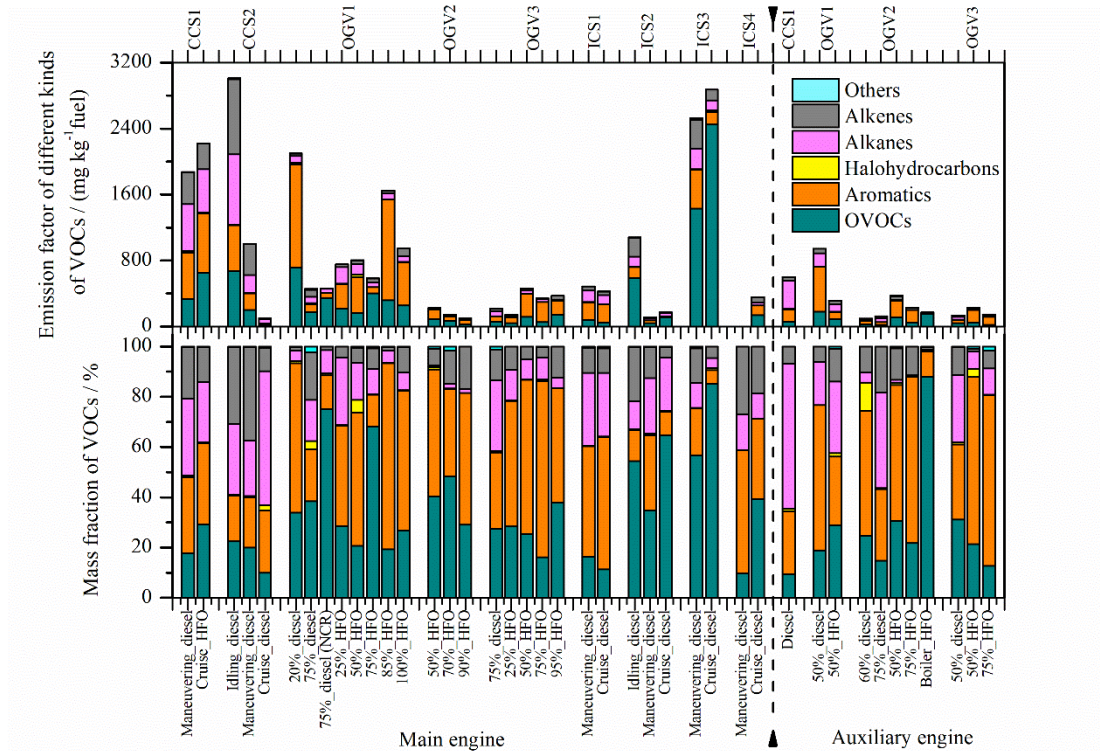

Figure S1 EFs of VOC components and their mass fractions

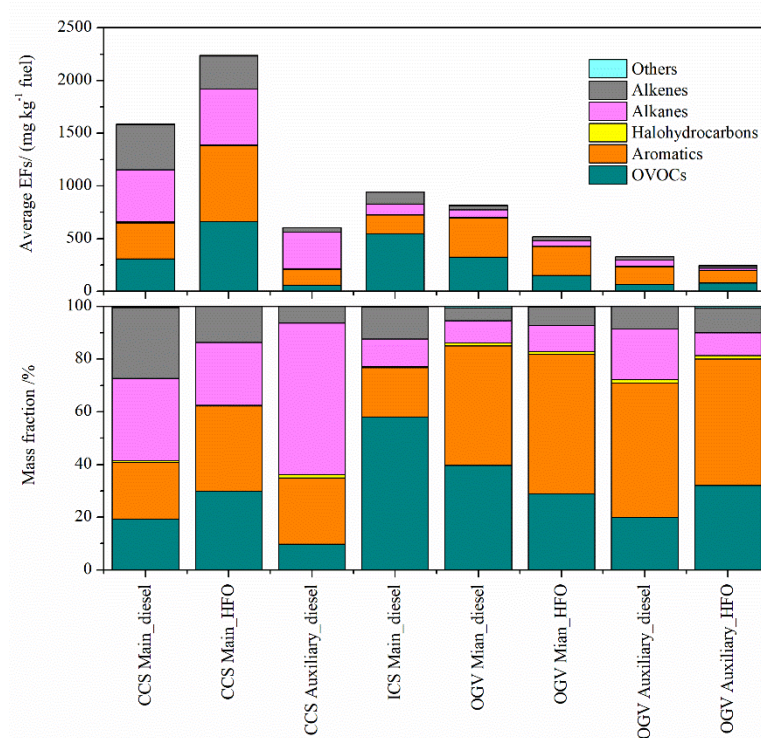

Figure S2 Average EFs of different kinds of VOCs and their mass fractions

Table S6 Mass concentrations of partial n-alkanes and PAHs in fuels (mg kg<sup>-1</sup> fuel)

| Species       | Diesel     | HFO        | Species        | Diesel    | HFO        |
|---------------|------------|------------|----------------|-----------|------------|
| n-dodecane    | 2.39±1.21  | 0.16±0.09  | naphthalene    | 0.11±0.04 | 2.16±1.69  |
| n-tridecane   | 2.05±0.80  | 0.31±0.08  | alkylated nap  | 0.21±0.09 | 0.94±0.72  |
| n-tetradecane | 2.00±0.76  | 0.41±0.03  | acenaphthylene | 0.23±0.12 | 0.65±0.65  |
| n-pentadecane | 2.75±1.36  | 0.63±0.21  | acenaphthene   | 0.11±0.04 | 0.18±0.12  |
| n-hexadecane  | 3.34±1.97  | 0.83±0.39  | fluorene       | 0.06±0.01 | 0.43±0.33  |
| n-heptadecane | 3.12±1.99  | 0.88±0.49  | phenanthrene   | 0.07±0.01 | 0.43±0.26  |
| n-octadecane  | 2.41±1.49  | 0.82±0.45  | anthracene     | 0.05±0.00 | 0.15±0.07  |
| n-nonadecane  | 1.99±1.19  | 0.83±0.47  | fluoranthene   | 0.02±0.00 | 0.17±0.11  |
| n-eicosane    | 1.57±0.85  | 0.78±0.45  | pyrene         | 0.05±0.01 | 0.48±0.29  |
| n-heneicosane | 1.19±0.54  | 0.79±0.48  | PAHs           | 89.4±29.8 | 146.1±75.6 |
| n-docosane    | 0.88±0.34  | 0.77±0.46  | UCM            | 19.6±11.9 | 17.57±9.95 |
| n-alkanes     | 307.0±87.1 | 259.4±68.1 |                |           |            |
| b-alkanes     | 26.9±13.8  | 8.01±3.79  |                |           |            |

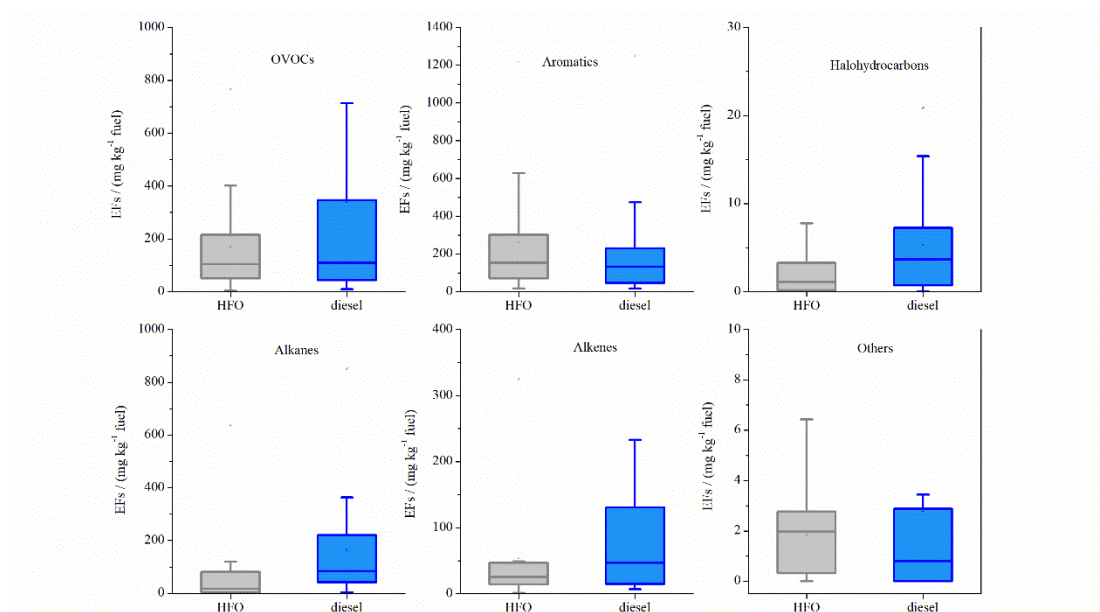

Figure S3 Box-whisker plots of VOC components between HFO and diesel

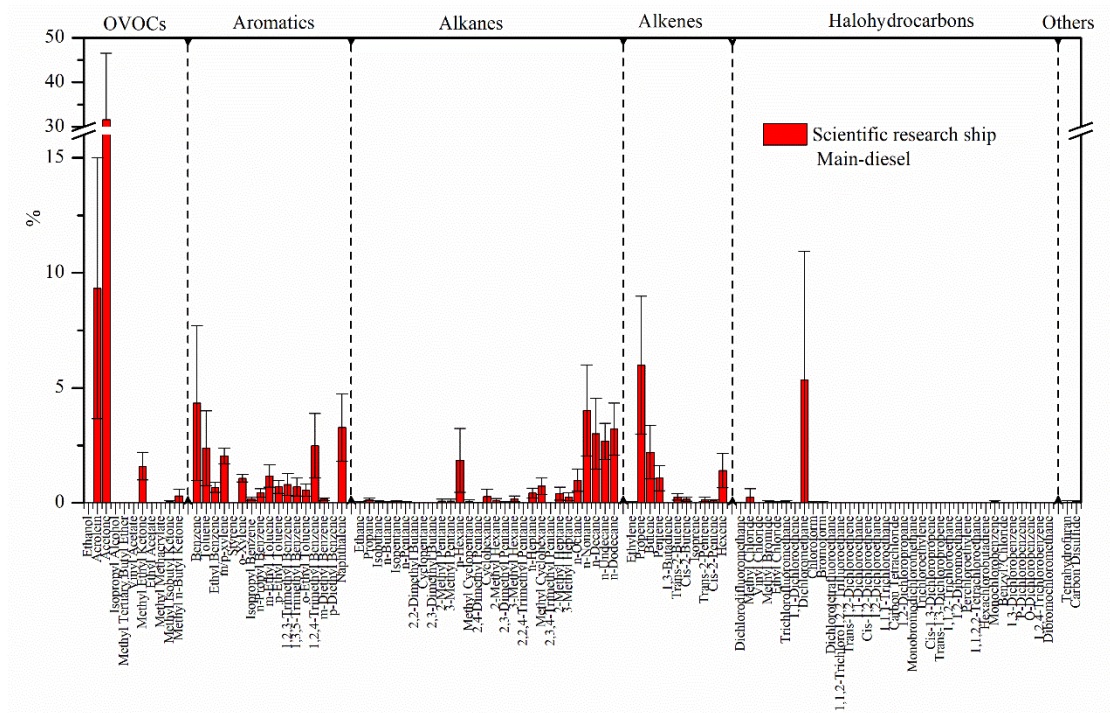

Figure S4 Profile of VOCs from a test scientific research ship

Table S7 Emission factors of the top 25 VOC species (mg kg<sup>-1</sup> fuel)

| Species                 | CCS Main-diesel<br>Mean±SD | Species                    | CCS Main-HFO<br>Mean±SD | Species                    | CCS Auxiliary-diesel<br>Mean±SD     | Species                    | ICS Main-diesel<br>Mean±SD   |
|-------------------------|----------------------------|----------------------------|-------------------------|----------------------------|-------------------------------------|----------------------------|------------------------------|
| Acrolein                | 164±175                    | Acetone                    | 510±134                 | n-Dodecane                 | 50.7±9.43                           | Acetone                    | 469±806                      |
| Propene                 | 154±132                    | Benzene                    | 194±38.5                | n-Undecane                 | 43.9±6.43                           | Propene                    | 69.3±68.1                    |
| Acetone                 | 108±96.8                   | Toluene                    | 179±40.2                | n-Decane                   | 41.8±5.21                           | Acrolein                   | 62.7±86.89                   |
| Butene                  | 108±96.3                   | Propene                    | 122±7.79                | n-Nonane                   | 41.5±5.66                           | Benzene                    | 62.2±53.2                    |
| Benzene                 | 90.2±67.3                  | m/p-xylene                 | 101±16.5                | n-Heptane                  | 36.1±3.40                           | n-Decane                   | 24.6±20.3                    |
| n-Dodecane              | 86.0±110                   | Acrolein                   | 93.9±2.92               | <i>n-Butane</i>            | 30.5±41.0                           | Naphthalene                | 24.5±30.8                    |
| n-Undecane              | 79.6±89.0                  | n-Heptane                  | 91.2±27.6               | Acetone                    | 30.0±11.1                           | n-Undecane                 | 22.3±16.7                    |
| n-Decane                | 60.6±57.8                  | Butene                     | 72.0±4.56               | Methyl Cyclohexane         | 27.6±2.83                           | Butene                     | 20.1±21.1                    |
| Toluene                 | 52.2±50.0                  | n-Nonane                   | 55.5±4.54               | Naphthalene                | 25.1±10.3                           | n-Dodecane                 | 18.3±12.2                    |
| Hexene                  | 47.2±43.4                  | Hexene                     | 47.9±8.43               | Acrolein                   | 19.1±1.19                           | 1,2,4-Trimethyl<br>Benzene | 17.4±18.9                    |
| Pentene                 | 45.0±40.4                  | Methyl Cyclohexane         | 43.9±15.7               | m/p-xylene                 | 18.0±2.32                           | Toluene                    | 16.2±14.4                    |
| Cis-2-Pentene           | 44.7±40.4                  | n-Decane                   | 42.5±5.82               | 1,3,5-Trimethyl<br>Benzene | 17.4±2.20                           | Methyl Ethyl<br>Ketone     | 15.7±18.2                    |
| Isobutane               | 43.1±50.4                  | Naphthalene                | 42.5±1.24               | Toluene                    | 16.5±1.60                           | n-Nonane                   | 13.8±12.8                    |
| 2-Methyl Hexane         | 36.9±NA.                   | o-Xylene                   | 37.1±6.37               | 1,2,4-Trimethyl<br>Benzene | 16.26±2.20                          | m/p-xylene                 | 10.4±10.0                    |
| n-Heptane               | 36±57.5                    | Ethyl Benzene              | 35.9±5.44               | Butene                     | 14.03±5.87                          | Pentene                    | 10.1±10.4                    |
| n-Nonane                | 35.4±31.1                  | Isopentane                 | 33.3±13.5               | Propene                    | 13.8±1.29                           | m-Ethyl Toluene            | 9.69±9.71                    |
| m/p-xylene              | 33.2±31.9                  | Methyl Ethyl Ketone        | 33.0±8.04               | 2-Methyl Hexane            | 13.0±1.19                           | Hexene                     | 8.84±9.23                    |
| Naphthalene             | 26.2±20.4                  | n-Pentane                  | 30.8±11.9               | Benzene                    | 12.8±1.07                           | o-Xylene                   | 6.15±5.09                    |
| 1,3,5-Trimethyl Benzene | 26.1±22.1                  | 1,3,5-Trimethyl<br>Benzene | 30.6±5.43               | 3-Methyl Heptane           | 10.8±1.04                           | Propane                    | 5.30±7.95                    |
| Methyl Cyclohexane      | 24.5±34.4                  | Pentene                    | 29.7±1.90               | n-Pentane                  | 10.1±10.3                           | p-Ethyl Toluene            | 5.22±5.17                    |
| Methyl Ethyl Ketone     | 23.8±25.2                  | Isobutane                  | 27.6±1.95               | Isopentane                 | 9.85±7.74                           | 1,2,3-Trimethyl<br>Benzene | 5.02±5.30                    |
| p-Diethyl Benzene       | 21.9±25.2                  | n-Undecane                 | 27.4±8.55               | Isobutane                  | 9.44±3.83                           | Ethyl Benzene              | 4.93±4.45                    |
| Isopentane              | 20.4±15.9                  | n-Hexane                   | 26.9±9.96               | p-Diethyl Benzene          | 8.48±0.96                           | n-Octane                   | 4.57±3.57                    |
| 1,2,4-Trimethyl Benzene | 18.8±15.6                  | 2-Methyl Hexane            | 26.5±9.03               | o-Xylene                   | 7.98±1.05                           | 1,3,5-Trimethyl<br>Benzene | 4.34±4.39                    |
| m-Ethyl Toluene         | 14.9±12.4                  | 1,2,4-Trimethyl<br>Benzene | 24.7±4.49               | m-Ethyl Toluene            | 7.74±1.07                           | o-Ethyl Toluene            | 4.18±4.09                    |
| Species                 | OGV Main-diesel<br>Mean±SD | Species                    | OGV Main-HFO<br>Mean±SD | Species                    | OGV Auxiliary-<br>diesel<br>Mean±SD | Species                    | OGV Auxiliary-HFO<br>Mean±SD |

|                         |           |                         |           |                         |           |                         |           |
|-------------------------|-----------|-------------------------|-----------|-------------------------|-----------|-------------------------|-----------|
| Naphthalene             | 317±593   | Naphthalene             | 198±281   | Naphthalene             | 117±193   | Naphthalene             | 68.9±49.6 |
| Acetone                 | 292±267   | Acetone                 | 111±104   | Acetone                 | 48.2±51.9 | Acetone                 | 61.5±49.4 |
| 1,3-Butadiene           | 28.7±35.9 | Acrolein                | 19.7±17.7 | n-Dodecane              | 19.4±16.0 | Acrolein                | 16.8±16.7 |
| Acrolein                | 24.7±21.2 | Propene                 | 14.3±13.4 | Acrolein                | 14.5±19.7 | m/p-xylene              | 12.0±11.2 |
| n-Dodecane              | 16.6±13.5 | Toluene                 | 14.0±26.5 | Propene                 | 13.3±14.0 | Propene                 | 10.9±10.2 |
| n-Undecane              | 13.1±11.0 | m/p-xylene              | 11.5±8.15 | m/p-xylene              | 12.7±13.1 | o-Xylene                | 7.51±7.34 |
| n-Decane                | 13.0±5.80 | 1,3-Butadiene           | 9.57±14.4 | n-Undecane              | 12.3±12.2 | Benzene                 | 7.31±4.14 |
| Propene                 | 12.2±7.05 | n-Nonane                | 9.04±14.8 | n-Decane                | 10.3±14.9 | Ethylene                | 5.86±8.36 |
| Benzene                 | 11.8±7.13 | n-Decane                | 8.84±11.7 | n-Nonane                | 8.25±13.5 | 1,2,4-Trimethyl Benzene | 5.33±4.61 |
| m/p-xylene              | 10.5±6.35 | Benzene                 | 8.12±5.14 | o-Xylene                | 7.68±8.07 | Ethyl Benzene           | 5.25±5.13 |
| n-Nonane                | 10.0±4.87 | o-Xylene                | 6.86±4.63 | 1,2,4-Trimethyl Benzene | 7.64±10.9 | Toluene                 | 4.88±4.09 |
| 1,2,4-Trimethyl Benzene | 7.32±2.16 | n-Dodecane              | 6.64±5.91 | Ethylene                | 6.46±5.42 | n-Dodecane              | 4.43±4.87 |
| Methyl Chloride         | 7.16±5.22 | 1,2,4-Trimethyl Benzene | 6.61±6.03 | Benzene                 | 4.88±4.19 | 1,4-Dioxane             | 4.18±4.21 |
| o-Xylene                | 6.20±3.95 | n-Undecane              | 6.21±5.59 | Ethyl Benzene           | 4.36±3.4  | n-Nonane                | 3.74±8.67 |
| Toluene                 | 5.18±2.70 | n-Octane                | 4.52±6.95 | Toluene                 | 3.77±3.91 | n-Decane                | 3.37±7.09 |
| Methyl Ethyl Ketone     | 4.89±4.56 | Ethyl Benzene           | 4.40±1.89 | m-Ethyl Toluene         | 3.32±6.09 | n-Undecane              | 3.17±3.96 |
| n-Octane                | 4.20±3.12 | Butene                  | 3.62±2.17 | n-Octane                | 2.91±5.38 | Butene                  | 2.79±2.92 |
| Tetrahydrofuran         | 4.02±4.66 | Methyl Cyclohexane      | 3.39±4.85 | Pentene                 | 2.56±4.53 | n-Octane                | 2.38±4.76 |
| m-Ethyl Toluene         | 3.60±1.26 | m-Ethyl Toluene         | 3.38±3.42 | Hexene                  | 2.38±4.23 | m-Ethyl Toluene         | 2.27±1.95 |
| Methyl Cyclohexane      | 3.51±2.34 | Ethylene                | 3.20±3.49 | Methyl Isobutyl Ketone  | 2.22±3.85 | Tetrahydrofuran         | 1.78±1.24 |
| Cyclohexane             | 3.39±5.88 | Methyl Ethyl Ketone     | 3.20±2.73 | Methyl Cyclohexane      | 2.13±3.89 | Bromoform               | 1.76±3.52 |
| Methyl Isobutyl Ketone  | 3.38±4.77 | Methyl Chloride         | 3.20±7.89 | o-Ethyl Toluene         | 2.13±3.92 | 1,2,3-Trimethyl Benzene | 1.75±1.98 |
| Ethyl Benzene           | 3.23±1.92 | Hexene                  | 2.86±4.83 | 1,4-Dioxane             | 2.01±1.16 | Pentene                 | 1.54±2.47 |
| 1,2,3-Trimethyl Benzene | 2.45±NA.  | Pentene                 | 2.82±3.77 | 1,2,4-Trichlorobenzene  | 1.92±3.10 | Methyl Cyclohexane      | 1.54±3.08 |
| Dichloromethane         | 2.06±2.59 | Methyl Isobutyl Ketone  | 2.79±3.68 | Butene                  | 1.73±1.50 | o-Ethyl Toluene         | 1.41±1.33 |



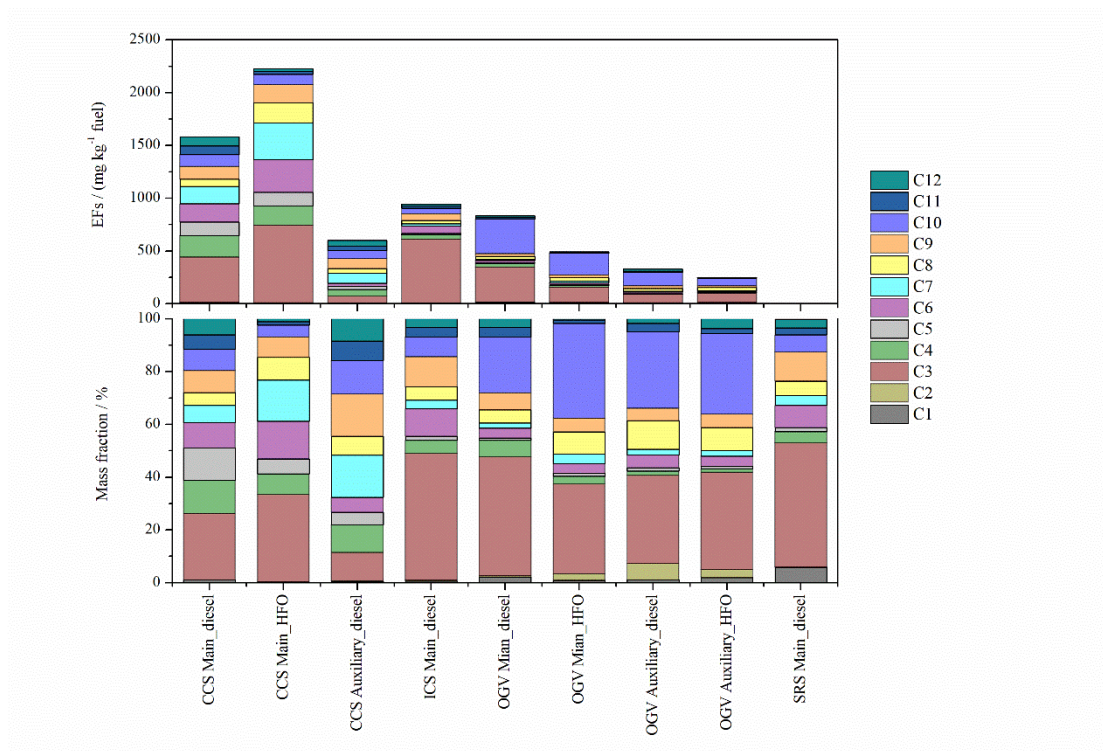

Figure S5 EFs and mass fractions of VOCs grouping based on carbon number

Table S8 Diagnostic ratios of VOCs from ship emissions

| Vessel type/fuel     | Toluene<br>/Benzene | Ethylbenzene/m,p-<br>Xylene | Isobutane/n-<br>Butane | Isopentane/n-<br>Pentane |
|----------------------|---------------------|-----------------------------|------------------------|--------------------------|
| CCS Main_diesel      | 0.72±0.41           | 0.38±0.05                   | 1.70±0.00              | 0.93±0.07                |
| CCS Main_HFO         | 0.90±0.02           | 0.35±0.00                   | 2.09±1.06              | 1.08±0.02                |
| CCS Auxiliary_diesel | 1.28±0.02           | 0.32±0.00                   | 2.26±2.91              | 1.24±0.50                |
| ICS Main_diesel      | 0.29±0.09           | 0.49±0.07                   | 0.67±0.18              | 1.09±0.22                |
| OGV Mian_diesel      | 0.48±0.19           | 0.31±0.02                   | 0.40±0.00              | -                        |
| OGV Mian_HFO         | 0.83±0.41           | 0.46±0.17                   | 0.33±0.03              | 0.67±0.20                |
| OGV Auxiliary_diesel | 0.73±0.22           | 0.44±0.24                   | 0.60±0.00              | 0.44±0.63                |
| OGV Auxiliary_HFO    | 0.57±0.27           | 0.48±0.16                   | 0.34±0.00              | 0.87±0.00                |

Table S9 The  $R_{O_3}$ ,  $R_{SOA}$ , OFP and SOAFP in this study and previous studies

| Vessel type/fuel                           | Sulfur content (% m/m) | $R_{O_3}$ (g O <sub>3</sub> g <sup>-1</sup> VOCs) | OFP (g O <sub>3</sub> kg <sup>-1</sup> fuel) | $R_{SOA, High NOx}$ (mg SOA g <sup>-1</sup> VOCs) | $R_{SOA, Low NOx}$ (mg SOA g <sup>-1</sup> VOCs) | SOAFP, High NOx (mg SOA kg <sup>-1</sup> fuel) | SOAFP, Low NOx (mg SOA kg <sup>-1</sup> fuel) | Sources              |
|--------------------------------------------|------------------------|---------------------------------------------------|----------------------------------------------|---------------------------------------------------|--------------------------------------------------|------------------------------------------------|-----------------------------------------------|----------------------|
| CCS Main_diesel                            | N.D.                   | 4.60                                              | 7.44                                         | 81.8                                              | 141                                              | 121                                            | 201                                           | This study           |
| CCS Main_HFO                               | 0.39                   | 3.54                                              | 7.81                                         | 63.2                                              | 137                                              | 140                                            | 303                                           | This study           |
| CCS Auxiliary_diesel                       | N.D.                   | 3.00                                              | 1.80                                         | 99.2                                              | 174                                              | 59.6                                           | 104                                           | This study           |
| ICS Main_diesel                            | N.D.                   | 3.43                                              | 2.66                                         | 77.1                                              | 144                                              | 49.7                                           | 91.8                                          | This study           |
| OGV Mian_diesel                            | 0.02-0.05              | 2.95                                              | 2.14                                         | 96.2                                              | 219                                              | 101                                            | 262                                           | This study           |
| OGV Mian_HFO                               | 0.43-0.50              | 3.72                                              | 1.56                                         | 114                                               | 312                                              | 80.0                                           | 196                                           | This study           |
| OGV Auxiliary_diesel                       | 0.02-0.05              | 3.67                                              | 1.15                                         | 134                                               | 294                                              | 47.7                                           | 116                                           | This study           |
| OGV Auxiliary_HFO                          | 0.43-0.50              | 3.55                                              | 0.91                                         | 113                                               | 303                                              | 26.5                                           | 71.5                                          | This study           |
| Vessels at berth/ before IFSP <sup>a</sup> | 1.60-2.90              | 3.19                                              | 0.35                                         | 288                                               | 313                                              | 37                                             | 40                                            | (Wu et al., 2020)    |
| Vessels at berth/ after IFSP <sup>a</sup>  | 0.01-1.14              | 5.41                                              | 10.37                                        | 73                                                | 105                                              | 96                                             | 137                                           | (Wu et al., 2020)    |
| River vessels/diesel                       | 0.02-0.06              | 5.55                                              | 22.98                                        | 37                                                | 69                                               | 165                                            | 322                                           | (Wu et al., 2020)    |
| OGV                                        | 0.38, 1.12             | 4.22                                              | 0.09-2.56                                    | 80                                                | 228                                              | 1.05-41.0                                      | 3.40-126                                      | (Huang et al., 2018) |
| Vessels at berth/diesel                    | 0.02-0.3               | 2.63                                              | -                                            | 17                                                | -                                                | -                                              | -                                             | (Xiao et al., 2018)  |
| Inland cargo ship/diesel                   | -                      | ~4.6-5.6 <sup>b</sup>                             | 0.33-0.83                                    | -                                                 | ~16-47 <sup>b</sup>                              | -                                              | 2.8-8.9                                       | (Wu et al., 2019)    |
| Container ship/diesel                      | 0.12                   | ~4.5 <sup>b</sup>                                 | ~0.8 <sup>b</sup>                            | -                                                 | ~17 <sup>b</sup>                                 | -                                              | ~4.5 <sup>b</sup>                             | (Wu et al., 2019)    |
| Container ship/HFO                         | 2.07                   | ~6.0 <sup>b</sup>                                 | ~2.6 <sup>b</sup>                            | -                                                 | ~28 <sup>b</sup>                                 | -                                              | ~8.7 <sup>b</sup>                             | (Wu et al., 2019)    |

<sup>a</sup>, IFSP, implementation of the fuel switch policy;

<sup>b</sup>, the values were estimated according to the bar chart.

Table S10 The top 20 contributing VOC species to OFP (%)

| Species                 | CCS Main-diesel<br>Mean±SD | Species                 | CCS Main-HFO<br>Mean±SD | Species                 | CCS Auxiliary-diesel<br>Mean±SD | Species                 | ICS Main-diesel<br>Mean±SD   |
|-------------------------|----------------------------|-------------------------|-------------------------|-------------------------|---------------------------------|-------------------------|------------------------------|
| Propene                 | 21.3±6.52                  | Propene                 | 18.3±1.24               | 1,3,5-Trimethyl Benzene | 11.3±0.19                       | Propene                 | 27.7±11.8                    |
| Acrolein                | 13.4±6.15                  | m/p-xylene              | 10.1±0.32               | Propene                 | 8.94±0.15                       | Acrolein                | 15.1±15.0                    |
| Butene                  | 13.0±3.85                  | Toluene                 | 9.11±0.86               | 1,2,4-Trimethyl Benzene | 8.00±0.20                       | 1,2,4-Trimethyl Benzene | 7.34±7.75                    |
| 1,3,5-Trimethyl Benzene | 6.08±4.32                  | Acrolein                | 9.03±0.91               | Acrolein                | 7.94±0.38                       | Butene                  | 6.69±3.08                    |
| Cis-2-Pentene           | 5.57±1.69                  | Butene                  | 9.02±0.62               | m/p-xylene              | 7.79±0.14                       | Acetone                 | 5.67±7.82                    |
| m/p-xylene              | 4.64±3.11                  | 1,3,5-Trimethyl Benzene | 4.6±0.21                | Butene                  | 7.46±2.35                       | m/p-xylene              | 3.87±3.57                    |
| Pentene                 | 3.88±1.19                  | o-Xylene                | 3.62±0.15               | Naphthalene             | 4.57±1.4                        | m-Ethyl Toluene         | 3.31±3.29                    |
| Toluene                 | 3.19±1.99                  | Hexene                  | 3.36±0.15               | Toluene                 | 3.66±0.05                       | Naphthalene             | 3.12±1.83                    |
| Hexene                  | 3.13±0.85                  | Cis-2-Pentene           | 2.81±1.9                | o-Xylene                | 3.39±0.07                       | 1,2,3-Trimethyl Benzene | 2.98±3.01                    |
| 1,2,4-Trimethyl Benzene | 3.08±1.85                  | 1,2,4-Trimethyl Benzene | 2.8±0.14                | m-Ethyl Toluene         | 3.17±0.09                       | Toluene                 | 2.93±2.11                    |
| o-Xylene                | 2.11±1.37                  | Pentene                 | 2.76±0.19               | Methyl Cyclohexane      | 2.61±0.02                       | Pentene                 | 2.39±1.05                    |
| m-Ethyl Toluene         | 2.08±1.31                  | Acetone                 | 2.33±0.31               | n-Heptane               | 2.15±0.03                       | 1,3,5-Trimethyl Benzene | 2.39±2.33                    |
| Naphthalene             | 1.98±1.65                  | m-Ethyl Toluene         | 2.27±0.11               | <i>n-Butane</i>         | 2.11±2.85                       | o-Xylene                | 2.24±1.75                    |
| p-Diethyl Benzene       | 1.57±0.94                  | Naphthalene             | 1.84±0.29               | p-Diethyl Benzene       | 2.09±0.01                       | Benzene                 | 1.87±1.06                    |
| Trans-2-Butene          | 1.48±1.04                  | Benzene                 | 1.78±0.12               | Cis-2-Pentene           | 2.06±0.02                       | Hexene                  | 1.58±0.73                    |
| n-Pentane               | 1.29±2.37                  | Trans-2-Butene          | 1.7±0.22                | n-Nonane                | 1.79±0.05                       | p-Ethyl Toluene         | 1.06±1.04                    |
| Isopentane              | 1.21±1.87                  | Ethyl Benzene           | 1.4±0.03                | n-Decane                | 1.58±0.02                       | o-Ethyl Toluene         | 1.06±0.95                    |
| Isobutane               | 1.13±1.05                  | n-Heptane               | 1.24±0.22               | n-Dodecane              | 1.54±0.12                       | Methyl Ethyl Ketone     | 0.96±0.62                    |
| Benzene                 | 0.85±0.39                  | Trans-2-Pentene         | 1.06±0.18               | n-Undecane              | 1.49±0.05                       | Ethylene                | 0.92±2.75                    |
| n-Dodecane              | 0.8±0.59                   | Methyl Cyclohexane      | 0.94±0.22               | Pentene                 | 1.43±0.01                       | n-Decane                | 0.87±0.67                    |
| Species                 | OGV Main-diesel<br>Mean±SD | Species                 | OGV Main-HFO<br>Mean±SD | Species                 | OGV Auxiliary-diesel<br>Mean±SD | Species                 | OGV Auxiliary-HFO<br>Mean±SD |
| Naphthalene             | 24.6±33.8                  | Naphthalene             | 32.3±20.01              | Naphthalene             | 23.1±13.4                       | Naphthalene             | 31.3±28.9                    |
| 1,3-Butadiene           | 14.5±21.8                  | Propene                 | 11.9±6.73               | Propene                 | 16.1±7.38                       | Propene                 | 11.4±8.14                    |
| Acrolein                | 9.86±1.61                  | Acrolein                | 10.0±6.57               | m/p-xylene              | 11.2±5.86                       | Acrolein                | 11.3±7.62                    |
| Propene                 | 9.74±7.13                  | m/p-xylene              | 8.68±8.75               | Ethylene                | 10.6±11.4                       | m/p-xylene              | 9.52±5.70                    |
| Acetone                 | 7.64±9.25                  | o-Xylene                | 5.38±5.94               | Acrolein                | 8.25±5.92                       | Acetone                 | 6.76±12.8                    |



|                         |           |                         |           |                         |           |                         |           |
|-------------------------|-----------|-------------------------|-----------|-------------------------|-----------|-------------------------|-----------|
| m/p-xylene              | 6.64±5.64 | 1,2,4-Trimethyl Benzene | 4.16±2.07 | o-Xylene                | 6.58±3.72 | o-Xylene                | 5.88±3.92 |
| 1,2,4-Trimethyl Benzene | 5.43±3.28 | Toluene                 | 4.09±7.97 | 1,2,4-Trimethyl Benzene | 5.22±1.03 | 1,2,4-Trimethyl Benzene | 4.63±2.2  |
| o-Xylene                | 3.73±2.97 | 1,3-Butadiene           | 3.67±9.52 | Butene                  | 2.83±3.28 | Ethylene                | 3.36±4.35 |
| m-Ethyl Toluene         | 2.11±1.19 | Ethylene                | 3.26±4.68 | Acetone                 | 1.93±1.15 | Butene                  | 2.60±2.05 |
| Butene                  | 1.90±3.80 | Butene                  | 2.81±2.82 | Ethyl Benzene           | 1.75±0.81 | Toluene                 | 1.99±0.74 |
| Toluene                 | 1.82±1.52 | Acetone                 | 2.77±2.47 | Toluene                 | 1.59±0.55 | Ethyl Benzene           | 1.62±0.90 |
| 1,2,3-Trimethyl Benzene | 1.01±2.02 | m-Ethyl Toluene         | 1.50±1.12 | n-Dodecane              | 1.47±1.60 | m-Ethyl Toluene         | 1.47±0.95 |
| Benzene                 | 0.96±1.20 | Ethyl Benzene           | 1.46±1.30 | m-Ethyl Toluene         | 1.06±1.32 | 1,2,3-Trimethyl Benzene | 1.45±1.58 |
| Pentene                 | 0.95±1.21 | Pentene                 | 1.14±0.90 | Pentene                 | 0.90±1.05 | Pentene                 | 0.93±1.34 |
| 1,3,5-Trimethyl Benzene | 0.81±1.62 | 1,3,5-Trimethyl Benzene | 0.73±0.82 | 1,3,5-Trimethyl Benzene | 0.86±1.01 | 1,3,5-Trimethyl Benzene | 0.88±0.88 |
| Ethyl Benzene           | 0.81±0.67 | 1,2,3-Trimethyl Benzene | 0.68±0.97 | n-Undecane              | 0.84±0.81 | Benzene                 | 0.68±0.29 |
| n-Dodecane              | 0.71±1.02 | Hexene                  | 0.65±0.88 | Trans-2-Butene          | 0.70±0.89 | o-Ethyl Toluene         | 0.66±0.50 |
| n-Nonane                | 0.67±0.63 | Benzene                 | 0.48±0.24 | Hexene                  | 0.64±0.74 | Hexene                  | 0.59±0.98 |
| n-Undecane              | 0.66±1.00 | o-Ethyl Toluene         | 0.46±0.55 | 1,2,3-Trimethyl Benzene | 0.57±1.14 | Trans-2-Butene          | 0.47±0.77 |
| Hexene                  | 0.65±1.31 | Methyl Isobutyl Ketone  | 0.40±1.01 | o-Ethyl Toluene         | 0.52±0.64 | n-Dodecane              | 0.35±0.42 |

Table S11 The top 20 contributing VOC species to SOAFP (%)

| Species                 | CCS Main-diesel<br>Mean±SD | Species                    | CCS Main-HFO<br>Mean±SD | Species                    | CCS Auxiliary-diesel<br>Mean±SD     | Species                    | ICS Main-diesel<br>Mean±SD   |
|-------------------------|----------------------------|----------------------------|-------------------------|----------------------------|-------------------------------------|----------------------------|------------------------------|
| Benzene                 | 15.7±8.53                  | Benzene                    | 24.0±0.71               | Naphthalene                | 17.3±4.01                           | Benzene                    | 24.6±11.8                    |
| n-Dodecane              | 15.4±7.82                  | Toluene                    | 18.1±1.02               | n-Dodecane                 | 17.0±0.02                           | Naphthalene                | 17.7±10.9                    |
| Naphthalene             | 11.9±4.78                  | m/p-xylene                 | 12.4±0.08               | n-Undecane                 | 11.5±0.47                           | n-Dodecane                 | 8.74±4.65                    |
| n-Undecane              | 10.9±4.11                  | Naphthalene                | 10.6±2.10               | m/p-xylene                 | 6.34±0.37                           | n-Undecane                 | 8.50±7.23                    |
| Toluene                 | 7.60±4.07                  | co-Xylene                  | 4.52±0.01               | 1,3,5-Trimethyl<br>Benzene | 6.11±0.37                           | 1,2,4-Trimethyl<br>Benzene | 6.47±5.26                    |
| m/p-xylene              | 6.29±2.91                  | Ethyl Benzene              | 4.38±0.08               | n-Decane                   | 5.92±0.37                           | Toluene                    | 5.67±3.17                    |
| 1,3,5-Trimethyl Benzene | 5.46±1.4                   | 1,3,5-Trimethyl<br>Benzene | 3.73±0.03               | 1,2,4-Trimethyl<br>Benzene | 5.72±0.30                           | m/p-xylene                 | 4.51±3.87                    |
| n-Decane                | 4.47±1.04                  | 1,2,4-Trimethyl<br>Benzene | 3.01±0.04               | Toluene                    | 4.85±0.44                           | n-Decane                   | 4.42±2.56                    |
| p-Diethyl Benzene       | 4.04±1.54                  | m-Ethyl Toluene            | 2.93±0.03               | Benzene                    | 4.60±0.48                           | m-Ethyl Toluene            | 3.53±2.67                    |
| 1,2,4-Trimethyl Benzene | 3.71±0.61                  | n-Dodecane                 | 2.88±0.05               | n-Nonane                   | 3.25±0.17                           | o-Xylene                   | 2.57±1.89                    |
| m-Ethyl Toluene         | 3.01±0.53                  | n-Undecane                 | 2.45±0.36               | p-Diethyl Benzene          | 2.99±0.22                           | Ethyl Benzene              | 2.08±1.66                    |
| o-Xylene                | 2.90±0.9                   | n-Decane                   | 2.09±0.07               | o-Xylene                   | 2.81±0.16                           | 1,2,3-Trimethyl<br>Benzene | 1.97±1.51                    |
| Ethyl Benzene           | 2.33±0.92                  | p-Ethyl Toluene            | 1.72±0.03               | m-Ethyl Toluene            | 2.72±0.14                           | p-Ethyl Toluene            | 1.89±1.41                    |
| o-Ethyl Toluene         | 1.45±0.22                  | n-Nonane                   | 1.52±0.13               | Ethyl Benzene              | 2.02±0.14                           | 1,3,5-Trimethyl<br>Benzene | 1.61±1.17                    |
| n-Nonane                | 1.37±0.51                  | p-Diethyl Benzene          | 1.46±0.05               | o-Ethyl Toluene            | 1.57±0.08                           | o-Ethyl Toluene            | 1.52±0.99                    |
| n-Propyl Benzene        | 1.14±0.12                  | o-Ethyl Toluene            | 1.27±0.02               | p-Ethyl Toluene            | 1.34±0.07                           | n-Propyl<br>Benzene        | 1.34±0.73                    |
| p-Ethyl Toluene         | 1.02±0.69                  | n-Propyl Benzene           | 1.00±0.01               | n-Propyl Benzene           | 1.08±0.04                           | n-Nonane                   | 1.18±0.54                    |
| m-Diethyl Benzene       | 0.45±0.35                  | Methyl Cyclohexane         | 0.58±0.11               | Methyl Cyclohexane         | 1.07±0.09                           | m-Diethyl<br>Benzene       | 0.83±0.55                    |
| Isopropyl Benzene       | 0.29±0.22                  | Isopropyl Benzene          | 0.49±0.01               | Isopropyl Benzene          | 0.58±0.00                           | Isopropyl<br>Benzene       | 0.48±0.32                    |
| Methyl Cyclohexane      | 0.29±0.47                  | n-Heptane                  | 0.27±0.04               | m-Diethyl Benzene          | 0.58±0.01                           | n-Octane                   | 0.21±0.12                    |
| Species                 | OGV Main-diesel<br>Mean±SD | Species                    | OGV Main-HFO<br>Mean±SD | Species                    | OGV Auxiliary-<br>diesel<br>Mean±SD | Species                    | OGV Auxiliary-HFO<br>Mean±SD |
| Naphthalene             | 48.0±33.8                  | Naphthalene                | 72.1±16.3               | Naphthalene                | 57.7±21.5                           | Naphthalene                | 64.4±21.9                    |
| Benzene                 | 10.4±12.7                  | m/p-xylene                 | 6.16±6.30               | n-Dodecane                 | 13.2±16.0                           | m/p-xylene                 | 7.72±5.63                    |
| m/p-xylene              | 7.30±7.03                  | o-Xylene                   | 3.87±4.22               | m/p-xylene                 | 6.57±3.54                           | Benzene                    | 5.31±3.96                    |
| n-Dodecane              | 6.99±8.82                  | Benzene                    | 3.53±2.57               | n-Undecane                 | 4.95±5.06                           | o-Xylene                   | 4.87±3.70                    |

|                         |           |                         |           |                         |           |                         |           |
|-------------------------|-----------|-------------------------|-----------|-------------------------|-----------|-------------------------|-----------|
| n-Undecane              | 4.61±5.97 | Toluene                 | 3.48±4.70 | o-Xylene                | 3.95±2.30 | 1,2,4-Trimethyl Benzene | 3.31±2.45 |
| 1,2,4-Trimethyl Benzene | 4.50±2.91 | Ethyl Benzene           | 2.62±2.55 | Benzene                 | 2.88±1.62 | Ethyl Benzene           | 3.17±2.20 |
| o-Xylene                | 4.23±4.06 | 1,2,4-Trimethyl Benzene | 2.35±1.52 | Ethyl Benzene           | 2.71±1.38 | Toluene                 | 2.52±1.64 |
| Toluene                 | 3.15±2.88 | n-Dodecane              | 1.45±1.82 | 1,2,4-Trimethyl Benzene | 2.61±0.28 | n-Dodecane              | 2.23±2.73 |
| Ethyl Benzene           | 2.27±2.15 | n-Undecane              | 1.07±1.10 | Toluene                 | 1.59±0.85 | n-Undecane              | 1.35±2.05 |
| m-Ethyl Toluene         | 2.19±1.61 | m-Ethyl Toluene         | 0.92±0.81 | n-Decane                | 1.36±1.09 | m-Ethyl Toluene         | 1.18±1.33 |
| n-Decane                | 2.00±2.20 | n-Decane                | 0.77±1.18 | m-Ethyl Toluene         | 0.55±0.64 | n-Decane                | 0.93±2.08 |
| n-Nonane                | 1.56±1.54 | n-Nonane                | 0.44±0.84 | n-Nonane                | 0.45±0.30 | o-Ethyl Toluene         | 0.75±0.90 |
| o-Ethyl Toluene         | 0.79±1.09 | o-Ethyl Toluene         | 0.30±0.42 | o-Ethyl Toluene         | 0.36±0.41 | 1,2,3-Trimethyl Benzene | 0.60±0.81 |
| 1,2,3-Trimethyl Benzene | 0.42±0.83 | p-Ethyl Toluene         | 0.23±0.31 | 1,3,5-Trimethyl Benzene | 0.31±0.38 | n-Nonane                | 0.59±1.40 |
| n-Octane                | 0.41±0.47 | 1,3,5-Trimethyl Benzene | 0.22±0.29 | p-Ethyl Toluene         | 0.25±0.30 | 1,3,5-Trimethyl Benzene | 0.47±0.71 |
| 1,3,5-Trimethyl Benzene | 0.34±0.68 | 1,2,3-Trimethyl Benzene | 0.21±0.33 | 1,2,3-Trimethyl Benzene | 0.23±0.47 | p-Ethyl Toluene         | 0.31±0.34 |
| Methyl Cyclohexane      | 0.28±0.30 | n-Propyl Benzene        | 0.14±0.23 | n-Propyl Benzene        | 0.20±0.23 | n-Octane                | 0.13±0.32 |
| p-Ethyl Toluene         | 0.24±0.48 | n-Octane                | 0.10±0.20 | n-Octane                | 0.05±0.06 | Methyl Cyclohexane      | 0.08±0.20 |
| n-Propyl Benzene        | 0.13±0.25 | Methyl Cyclohexane      | 0.06±0.14 | Methyl Cyclohexane      | 0.04±0.05 | n-Propyl Benzene        | 0.05±0.08 |
| m-Diethyl Benzene       | 0.11±0.22 | Isopropyl Benzene       | 0.01±0.02 | Cyclohexane             | 0.01±0.02 | n-Heptane               | 0.01±0.02 |

---

## REFERENCES

- Chan, A. W. H., Kautzman, K. E., Chhabra, P. S., Surratt, J. D., Chan, M. N., Crounse, J. D., Kuerten, A., Wennberg, P. O., Flagan, R. C., and Seinfeld, J. H.: Secondary organic aerosol formation from photooxidation of naphthalene and alkylnaphthalenes: implications for oxidation of intermediate volatility organic compounds (IVOCs), *Atmos. Chem. Phys.*, 9, 3049-3060, 2009.
- Derwent, R. G., Jenkin, M. E., Utembe, S. R., Shallcross, D. E., Murrells, T. P., and Passant, N. R.: Secondary organic aerosol formation from a large number of reactive man-made organic compounds, *Sci. Total Environ.*, 408, 3374-3381, 10.1016/j.scitotenv.2010.04.013, 2010.
- Grosjean, D.: In situ organic aerosol formation during a smog episode: Estimated production and chemical functionality, *Atmos. Environ. Part A. General Topics*, 26, 953-963, [https://doi.org/10.1016/0960-1686\(92\)90027-I](https://doi.org/10.1016/0960-1686(92)90027-I), 1992.
- Huang, C., Hu, Q., Li, Y., Tian, J., Ma, Y., Zhao, Y., Feng, J., An, J., Qiao, L., Wang, H., Jing, S. a., Huang, D., Lou, S., Zhou, M., Zhu, S., Tao, S., and Li, L.: Intermediate Volatility Organic Compound Emissions from a Large Cargo Vessel Operated under Real-World Conditions, *Environ. Sci. Technol.*, 52, 12934-12942, 10.1021/acs.est.8b04418, 2018.
- Lim, Y. B., and Ziemann, P. J.: Effects of Molecular Structure on Aerosol Yields from OH Radical-Initiated Reactions of Linear, Branched, and Cyclic Alkanes in the Presence of NO<sub>x</sub>, *Environ. Sci. Technol.*, 43, 2328-2334, 10.1021/es803389s, 2009.
- Ng, N. L., Chhabra, P. S., Chan, A. W. H., Surratt, J. D., Kroll, J. H., Kwan, A. J., McCabe, D. C., Wennberg, P. O., Sorooshian, A., Murphy, S. M., Dalleska, N. F., Flagan, R. C., and Seinfeld, J. H.: Effect of NO<sub>x</sub> level on secondary organic aerosol (SOA) formation from the photooxidation of terpenes, *Atmos. Chem. Phys.*, 7, 5159-5174, 2007.
- Wu, D., Ding, X., Li, Q., Sun, J. F., Huang, C., Yao, L., Wang, X. M., Ye, X. N., Chen, Y. J., He, H., and Chen, J. M.: Pollutants emitted from typical Chinese vessels: Potential contributions to ozone and secondary organic aerosols, *Journal of Cleaner Production*, 238, 9, 10.1016/j.jclepro.2019.117862, 2019.
- Wu, Z., Zhang, Y., He, J., Chen, H., Huang, X., Wang, Y., Yu, X., Yang, W., Zhang, R., Zhu, M., Li, S., Fang, H., Zhang, Z., and Wang, X.: Dramatic increase in reactive volatile organic compound (VOC) emissions from ships at berth after implementing the fuel switch policy in the Pearl River Delta Emission Control Area, *Atmos. Chem. Phys.*, 20, 1887-1900, 10.5194/acp-20-1887-2020, 2020.
- Xiao, Q., Li, M., Liu, H., Fu, M., Deng, F., Lv, Z., Man, H., Jin, X., Liu, S., and He, K.: Characteristics of marine shipping emissions at berth: profiles for particulate matter and volatile organic compounds, *Atmos. Chem. Phys.*, 18, 9527-9545, 10.5194/acp-18-9527-2018, 2018.
